# Supplementary material
Source: PubMed Central journal article supplement (PMC3149736)
Supplement: NIHMS285932-supplement-suppl_figures.pdf [file NIHMS285932-supplement-suppl_figures.pdf]

Fig. E1

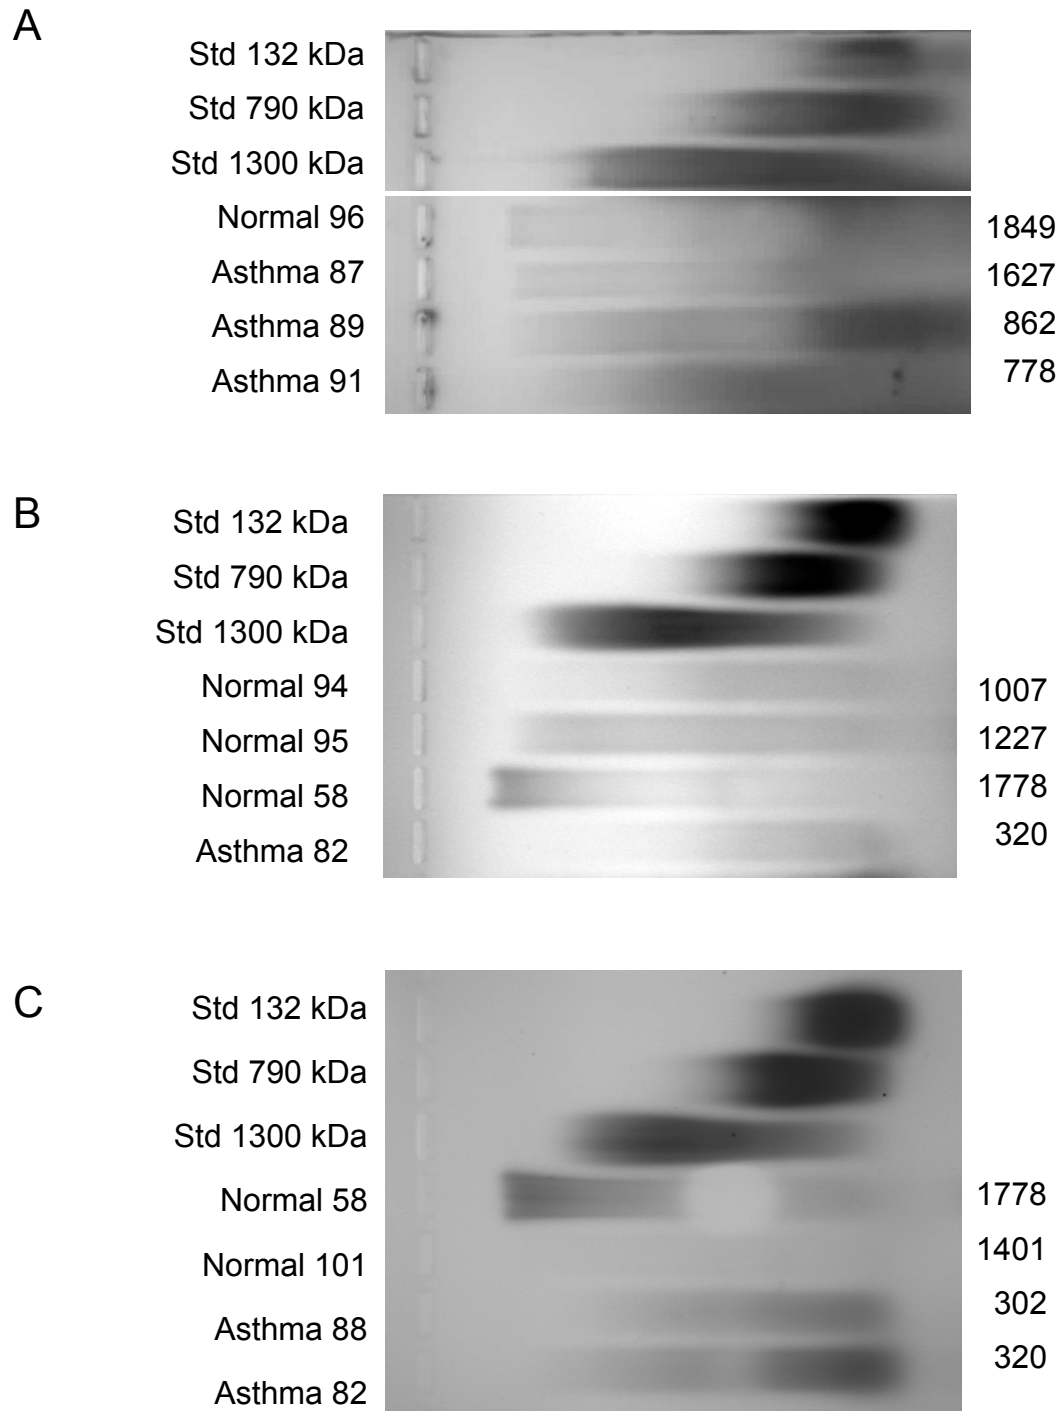

**FIG E1.** Molecular mass of HA from 48-hour conditioned media of fibroblasts from asthmatic and normal controls. HA molecular mass peaks are shown on the right.

Fig. E2

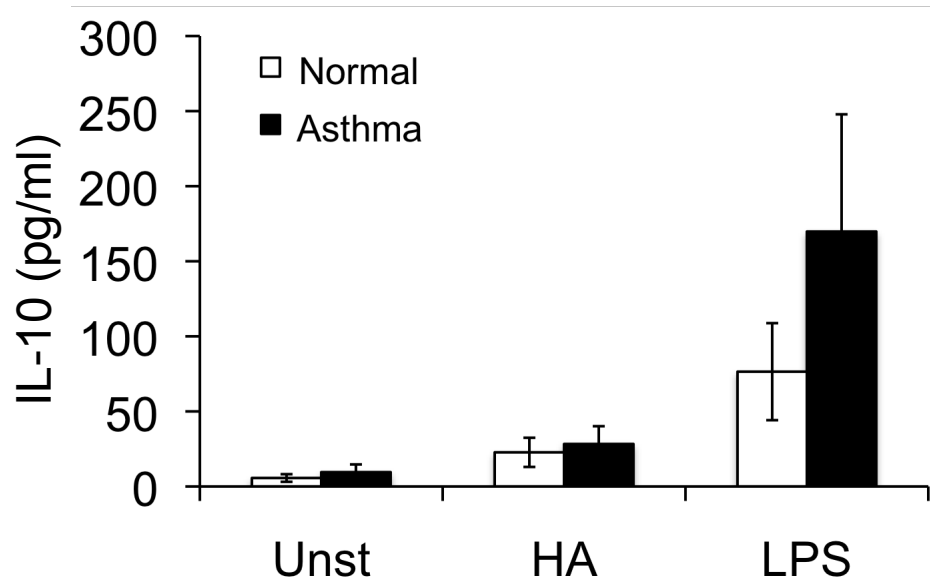

**FIG E2.** IL-10 levels in 24-hour conditioned media collected from BAL alveolar macrophages from asthmatic and normal subjects treated with either HA or LPS (n = 7 - 8,  $p > 0.05$  between normal and asthma).

Fig. E3

A

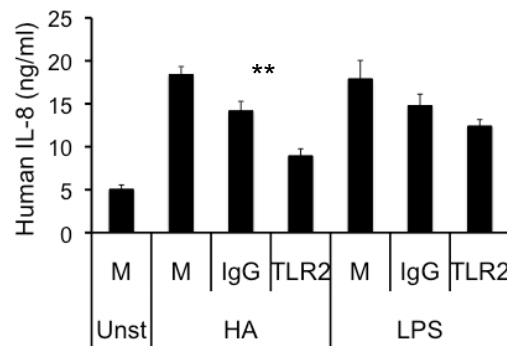

B

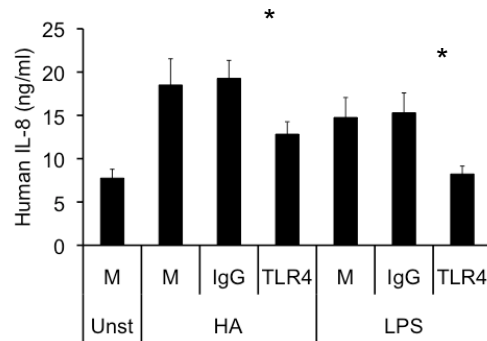

**FIG E3. Cytokine production by macrophages is altered in response to HA fragments and is TLR2- and TLR4-dependent.** U937 cells (a human monocyte/macrophage cell line) were incubated with 100 nm PMA at 37°C for 24 hours. Adherent cells were then washed three times with PBS and incubated in complete media (without PMA) for additional 24 hours before use for experiments. Cells were incubated with anti-human TLR2 (clone TL2.1) or mouse IgG2a isotype control (20  $\mu$ g/ml) at room temperature for 30 min or with anti-human TLR4 (clone HTA125) or mouse IgG2a isotype control (20  $\mu$ g/ml) at 37°C for one hour. Hereafter cells were treated with low molecular HA 100  $\mu$ g/ml or LPS 100 ng/ml in serum free medium. 24-hour culture media were collected for measuring human IL-8 concentration. All antibodies were from eBioscience (n = 7 - 8, \* $p$  < 0.05, \*\* $p$  < 0.01).
